# Supplementary material
Source: ML conference proceedings conference paper supplement (https://proceedings.mlr.press/v115/derman20a.html)
Supplement: Supplementary file [file derman20a-supp.pdf]

## A Bayesian Approach to Robust Reinforcement Learning - Appendix

### A Theoretical Proofs

Recall the assumptions made in the paper:

**Assumption A.1.** For any episode, the graph resulting from a worst-case transition model is directed and acyclic.

**Assumption A.2.** For all  $(s, a) \in \mathcal{S} \times \mathcal{A}$ , the rewards are bounded:  $-R_{\max} \leq r_{sa} \leq R_{\max}$ . This implies that the robust  $Q$ -value is bounded as well:  $|Q_{sa}^h| \leq HR_{\max} =: Q_{\max}$ .

Recall also the worst-case transition from a posterior uncertainty set:

$$\widehat{Q}_{sa}^h = r_{sa}^h + \inf_{p \in \widehat{\mathcal{P}}_{sa}^h} \sum_{s', a'} \pi_{s'a'}^h p_{sas'} \widehat{Q}_{s'a'}^{h+1},$$

with  $\widehat{Q}_{sa}^{H+1} = 0$  and

$$\widehat{p}_{sa}^h \in \arg \min_{p \in \widehat{\mathcal{P}}_{sa}^h} \sum_{s', a'} \pi_{s'a'}^h p_{sas'} \widehat{Q}_{s'a'}^{h+1} \quad (1)$$

is a worst-case transition at step  $h$ .

#### A.1 Proof of Lemma 4.1

**Lemma A.1.** Under Assumptions A.1 and A.2, for any worst-case transition  $\widehat{p}$  as defined in equation (1), the conditional variance of the robust  $Q$ -values under the posterior distribution satisfies the robust Bellman inequality:

$$\mathbf{var}_t \widehat{Q}_{sa}^h \leq \nu_{sa}^h + \sum_{s', a'} \pi_{s'a'}^h \mathbb{E}_t(\widehat{p}_{sas'}^h) \mathbf{var}_t \widehat{Q}_{s'a'}^{h+1},$$

with  $\mathbf{var}_t \widehat{Q}_{sa}^{H+1} = 0$  and  $\nu_{sa}^h := Q_{\max}^2 \sum_{s' \in \mathcal{S}} \frac{\mathbf{var}_t \widehat{p}_{sas'}^h}{\mathbb{E}_t \widehat{p}_{sas'}^h}$ .

*Proof.* The proof for the robust setup follows the same line as in O'Donoghue et al. [2018] and is given here for completeness.

First rewrite the conditional variance:

$$\begin{aligned} \mathbf{var}_t(\widehat{Q}_{sa}^h) &:= \mathbb{E}_t \left( \widehat{Q}_{sa}^h - \mathbb{E}_t \widehat{Q}_{sa}^h \right)^2 \\ &= \mathbb{E}_t \left( \inf_{p \in \widehat{\mathcal{P}}_{sa}^h} \sum_{s', a'} \pi_{s'a'}^h p_{sas'} \widehat{Q}_{s'a'}^{h+1} - \mathbb{E}_t \inf_{p \in \widehat{\mathcal{P}}_{sa}^h} \sum_{s', a'} \pi_{s'a'}^h p_{sas'} \widehat{Q}_{s'a'}^{h+1} \right)^2 \\ &= \mathbb{E}_t \left( \sum_{s', a'} \pi_{s'a'}^h \widehat{p}_{sas'}^h \widehat{Q}_{s'a'}^{h+1} - \mathbb{E}_t \sum_{s', a'} \pi_{s'a'}^h \widehat{p}_{sas'}^h \widehat{Q}_{s'a'}^{h+1} \right)^2 \\ &= \mathbb{E}_t \left( \sum_{s', a'} \pi_{s'a'}^h \left( \widehat{p}_{sas'}^h \widehat{Q}_{s'a'}^{h+1} - \mathbb{E}_t \widehat{p}_{sas'}^h \widehat{Q}_{s'a'}^{h+1} \right) \right)^2, \end{aligned}$$

where we used the following definitions:

$$\begin{aligned} \widehat{Q}_{sa}^h &= r_{sa}^h + \inf_{p \in \widehat{\mathcal{P}}_{sa}^h} \sum_{s', a'} \pi_{s'a'}^h p_{sas'} \widehat{Q}_{s'a'}^{h+1} \\ \widehat{p}_{sa}^h &\in \arg \inf_{p \in \widehat{\mathcal{P}}_{sa}^h} \sum_{s', a'} \pi_{s'a'}^h p_{sas'} \widehat{Q}_{s'a'}^{h+1}. \end{aligned}$$

Assume that  $\mathbb{E}_t \widehat{p}_{sas'}^h > 0$  for all  $h, s, a, s'$  belonging to the adequate sets. Since any worst-case transition satisfies  $\sum_{s'} \widehat{p}_{sas'}^h = 1$ , we have  $\sum_{s', a'} \pi_{s'a'} \mathbb{E}_t \widehat{p}_{sas'}^h = 1$  and  $\pi_{s'a'} \mathbb{E}_t \widehat{p}_{sas'}^h$  defines a probability distribution over states and actions. Thus,

$$\begin{aligned} \mathbb{E}_t \left( \sum_{s', a'} \pi_{s'a'}^h \left( \widehat{p}_{sas'}^h \widehat{Q}_{s'a'}^{h+1} - \mathbb{E}_t \widehat{p}_{sas'}^h \widehat{Q}_{s'a'}^{h+1} \right) \right)^2 &= \mathbb{E}_t \left( \sum_{s', a'} \pi_{s'a'}^h \frac{\mathbb{E}_t \widehat{p}_{sas'}^h}{\mathbb{E}_t \widehat{p}_{sas'}^h} \left( \widehat{p}_{sas'}^h \widehat{Q}_{s'a'}^{h+1} - \mathbb{E}_t \sum_{s', a'} \widehat{p}_{sas'}^h \widehat{Q}_{s'a'}^{h+1} \right) \right)^2 \\ &\leq \sum_{s', a'} \pi_{s'a'}^h \frac{\mathbb{E}_t \widehat{p}_{sas'}^h}{\left( \mathbb{E}_t \widehat{p}_{sas'}^h \right)^2} \mathbb{E}_t \left( \widehat{p}_{sas'}^h \widehat{Q}_{s'a'}^{h+1} - \mathbb{E}_t \sum_{s', a'} \widehat{p}_{sas'}^h \widehat{Q}_{s'a'}^{h+1} \right)^2, \end{aligned}$$

by applying Jensen's inequality to the convex function  $x \mapsto x^2$ . Therefore,

$$\text{var}_t(\widehat{Q}_{sa}^h) \leq \sum_{s', a'} \pi_{s'a'}^h \frac{\mathbb{E}_t \widehat{p}_{sas'}^h}{\left( \mathbb{E}_t \widehat{p}_{sas'}^h \right)^2} \mathbb{E}_t \left( \widehat{p}_{sas'}^h \widehat{Q}_{s'a'}^{h+1} - \mathbb{E}_t \widehat{p}_{sas'}^h \widehat{Q}_{s'a'}^{h+1} \right)^2$$

Rewriting  $\widehat{Q}_{s'a'}^{h+1} = r_{s'a'}^{h+1} + \inf_{p \in \widehat{\mathcal{P}}_{s'a'}^{h+1}} \sum_{s'', a''} \pi_{s''a''}^{h+1} p_{s''a''}^{h+1} \widehat{Q}_{s''a''}^{h+2}$  and  $\widehat{p}_{sa}^h = \arg \inf_{p \in \widehat{\mathcal{P}}_{sa}^h} \sum_{s', a'} \pi_{s'a'}^h p_{s'a'}^h \widehat{Q}_{s'a'}^{h+1}$  enables us to claim that under Assumption A.1,  $\widehat{p}_{sa}^h$  is independent of  $\widehat{Q}_{s'a'}^{h+1}$  conditionally on  $\mathcal{F}_t$ , because  $\widehat{Q}_{s'a'}^{h+1}$  depends on downstream uncertainty sets. Note that this claim relies on the rectangular structure of the uncertainty set. Thus,

$$\begin{aligned} \mathbb{E}_t \left( \widehat{p}_{sas'}^h \widehat{Q}_{s'a'}^{h+1} - \mathbb{E}_t \widehat{p}_{sas'}^h \widehat{Q}_{s'a'}^{h+1} \right)^2 &= \mathbb{E}_t \left( \left( \widehat{p}_{sas'}^h - \mathbb{E}_t \widehat{p}_{sas'}^h \right) \widehat{Q}_{s'a'}^{h+1} + \mathbb{E}_t \widehat{p}_{sas'}^h \left( \widehat{Q}_{s'a'}^{h+1} - \mathbb{E}_t \widehat{Q}_{s'a'}^{h+1} \right) \right)^2 \\ &= \mathbb{E}_t \left( \left( \widehat{p}_{sas'}^h - \mathbb{E}_t \widehat{p}_{sas'}^h \right) \widehat{Q}_{s'a'}^{h+1} \right)^2 + \mathbb{E}_t \left( \widehat{p}_{sas'}^h \left( \widehat{Q}_{s'a'}^{h+1} - \mathbb{E}_t \widehat{Q}_{s'a'}^{h+1} \right) \right)^2. \end{aligned}$$

We use the conditional independence property again and Assumption A.2 in order to deduce the following:

$$\begin{aligned} \mathbb{E}_t \left( \left( \widehat{p}_{sas'}^h - \mathbb{E}_t \widehat{p}_{sas'}^h \right) \widehat{Q}_{s'a'}^{h+1} \right)^2 &= \mathbb{E}_t \left( \widehat{p}_{sas'}^h - \mathbb{E}_t \widehat{p}_{sas'}^h \right)^2 \mathbb{E}_t \left( \widehat{Q}_{s'a'}^{h+1} \right)^2 \leq Q_{\max}^2 \text{var}_t \widehat{p}_{sas'}^h, \\ \text{and } \mathbb{E}_t \left( \widehat{p}_{sas'}^h \left( \widehat{Q}_{s'a'}^{h+1} - \mathbb{E}_t \widehat{Q}_{s'a'}^{h+1} \right) \right)^2 &= \mathbb{E}_t \left( \widehat{p}_{sas'}^h \right)^2 \mathbb{E}_t \left( \widehat{Q}_{s'a'}^{h+1} - \mathbb{E}_t \widehat{Q}_{s'a'}^{h+1} \right)^2 = \mathbb{E}_t \left( \widehat{p}_{sas'}^h \right)^2 \text{var}_t \widehat{Q}_{s'a'}^{h+1}. \end{aligned}$$

Finally,

$$\begin{aligned} \text{var}_t(\widehat{Q}_{sa}^h) &\leq \sum_{s', a'} \pi_{s'a'}^h \frac{\mathbb{E}_t \widehat{p}_{sas'}^h}{\left( \mathbb{E}_t \widehat{p}_{sas'}^h \right)^2} \left( Q_{\max}^2 \text{var}_t \widehat{p}_{sas'}^h + \mathbb{E}_t \left( \widehat{p}_{sas'}^h \right)^2 \text{var}_t \widehat{Q}_{s'a'}^{h+1} \right) \\ &\leq \sum_{s', a'} \pi_{s'a'}^h \frac{\mathbb{E}_t \widehat{p}_{sas'}^h}{\left( \mathbb{E}_t \widehat{p}_{sas'}^h \right)^2} Q_{\max}^2 \text{var}_t \widehat{p}_{sas'}^h + \sum_{s', a'} \pi_{s'a'}^h \mathbb{E}_t \widehat{p}_{sas'}^h \text{var}_t \widehat{Q}_{s'a'}^{h+1} \\ &\leq Q_{\max}^2 \sum_{s'} \frac{\text{var}_t \widehat{p}_{sas'}^h}{\mathbb{E}_t \widehat{p}_{sas'}^h} + \sum_{s', a'} \pi_{s'a'}^h \mathbb{E}_t \widehat{p}_{sas'}^h \text{var}_t \widehat{Q}_{s'a'}^{h+1} \\ &\leq \nu_{sa}^h + \sum_{s', a'} \pi_{s'a'}^h \mathbb{E}_t \widehat{p}_{sas'}^h \text{var}_t \widehat{Q}_{s'a'}^{h+1}, \end{aligned}$$

where  $\nu_{sa}^h$  is given by  $\nu_{sa}^h := Q_{\max}^2 \sum_{s'} \frac{\text{var}_t \widehat{p}_{sas'}^h}{\mathbb{E}_t \widehat{p}_{sas'}^h}$ . □

## A.2 Proof of Theorem 4.1

**Theorem A.1** (Solution of URBE). *For any worst-case transition  $\widehat{p}$  as defined in equation (1) and any policy  $\pi$ , under Assumptions A.1 and A.2, there exists a unique mapping  $w$  that satisfies the uncertainty robust Bellman equation:*

$$w_{sa}^h = \nu_{sa}^h + \sum_{s' \in \mathcal{S}, a' \in \mathcal{A}} \pi_{s'a'}^h \mathbb{E}_t \left( \widehat{p}_{sas'}^h \right) w_{s'a'}^{h+1}, \quad (2)$$

for all  $(s, a) \in \mathcal{S} \times \mathcal{A}$  and  $h = 1, \dots, H$  where  $w^{H+1} = 0$ . Furthermore,  $w \geq \text{var}_t \widehat{Q}$ .

*Proof.* Denote by  $\mathcal{W}^h$  the robust Bellman operator underlying equation (2) and rewrite it as  $\mathcal{W}^h w^{h+1} = w^h$ . We can easily see that the robust Bellman operator is non-decreasing. Also, it has a unique solution, as stated in the following lemma, which is the policy evaluation version of the Min-Max Problem addressed in Bertsekas [2000] (Exercise 1.5).

**Lemma A.2.** For every  $(s, a) \in \mathcal{S} \times \mathcal{A}$ , for all step  $h = 1, \dots, H$ ,  $w_{sa}^h$  is given by the subsequent steps of the following algorithm which proceeds backwards from  $H + 1$  to  $h$ :

$$\begin{cases} w_{sa}^{H+1} = 0 \text{ for all } (s, a) \in \mathcal{S} \times \mathcal{A} \\ w_{sa}^h = \nu_{sa}^h + \sum_{s' \in \mathcal{S}, a' \in \mathcal{A}} \pi_{s'a'}^h \mathbb{E}_t(\hat{p}_{sas'}) w_{s'a'}^{h+1} \end{cases}$$

Therefore, there exists a unique solution to  $\mathcal{W}^h w^{h+1} = w^h, h = 1, \dots, H$ .

The lower-bound then follows from induction reasoning. At step  $H$ , we have  $\text{var}_t \hat{Q}^{H+1} = 0 = w^{H+1}$ . Assume that for some  $h \leq H$  we have  $w^{h+1} \geq \text{var}_t \hat{Q}^{h+1}$ . Then, by assumption and using Lemma A.1, we get:

$$\text{var}_t \hat{Q}^h \leq \mathcal{W}^h \text{var}_t \hat{Q}^{h+1} \leq \mathcal{W}^h w^{h+1} = w^h.$$

The induction property is hereditary, which concludes the proof of the theorem.  $\square$

## B DQN-URBE Experiments

Table 1: System’s dynamics

|                         | MARSROVER   | CARTPOLE                |
|-------------------------|-------------|-------------------------|
| Nominal model           | $p = 0.005$ | Length = 0.75, Mass = 1 |
| Size of uncertainty set | 15 samples  | 15 samples              |

Table 2: Networks

| DQN-URBE NETWORKS | MARSROVER                                                                     | CARTPOLE                                                                       |
|-------------------|-------------------------------------------------------------------------------|--------------------------------------------------------------------------------|
| Q-network         | ReLU(2 hidden layers of size 10)                                              | ReLU(3 hidden layers of size 128)                                              |
| U(R)BE-network    | ReLU(1 hidden layer of size 15),<br>linear activation function for the output | ReLU(1 hidden layer of size 100),<br>linear activation function for the output |

Table 3: Hyper-parameters

| DQN-URBE HYPERPARAMETERS                        | MARSROVER | CARTPOLE |
|-------------------------------------------------|-----------|----------|
| Discount factor $\gamma$                        | 0.9       | 0.9      |
| Q-learning rate                                 | 1e-4      | 1e-4     |
| U(R)BE network learning rate                    | 1e-4      | 1e-4     |
| Initial variance coefficient $\mu$              | 1e-2      | 1e-2     |
| Posterior parameter $\beta$                     | 0.5       | 0.5      |
| Mini-batch size                                 | 100       | 256      |
| Final epsilon                                   | 1e-3      | 1e-5     |
| Target update interval                          | 10        | 10       |
| Max number of episodes for training $M_{train}$ | 3000      | 4000     |
| Number of episodes for testing $M_{test}$       | 200       | 200      |

## References

- Dimitri P. Bertsekas. *Dynamic Programming and Optimal Control*, volume 1. Athena Scientific, 2<sup>d</sup> edition, 2000.
- Brendan O'Donoghue, Ian Osband, Remi Munos, and Volodymyr Mnih. The Uncertainty Bellman Equation and Exploration. *Proceedings of the 35th International Conference on Machine Learning*, 2018.
